# Supplementary material
Source: publisher figshare collection journal article supplement (https://gsajournals.figshare.com/ndownloader/files/25531790)
Supplement: Supplementary file 1 [file 25531790]

# Genome Assembly and Annotation of the California Harvester Ant *Pogonomyrmex californicus* (Buckley, 1867)

---

Jonas Bohn<sup>\*,1</sup>, Reza Halabian<sup>\*</sup>, Lukas Schrader<sup>†</sup>, Victoria Shabardina<sup>\*,2</sup>, Raphael Steffent<sup>†</sup>, Yutaka Suzuki<sup>‡</sup>, Ulrich R. Ernst<sup>†</sup>, Jürgen Gadau<sup>†,3</sup>, Wojciech Makalowski<sup>\*,3</sup>

## Supplementary materials

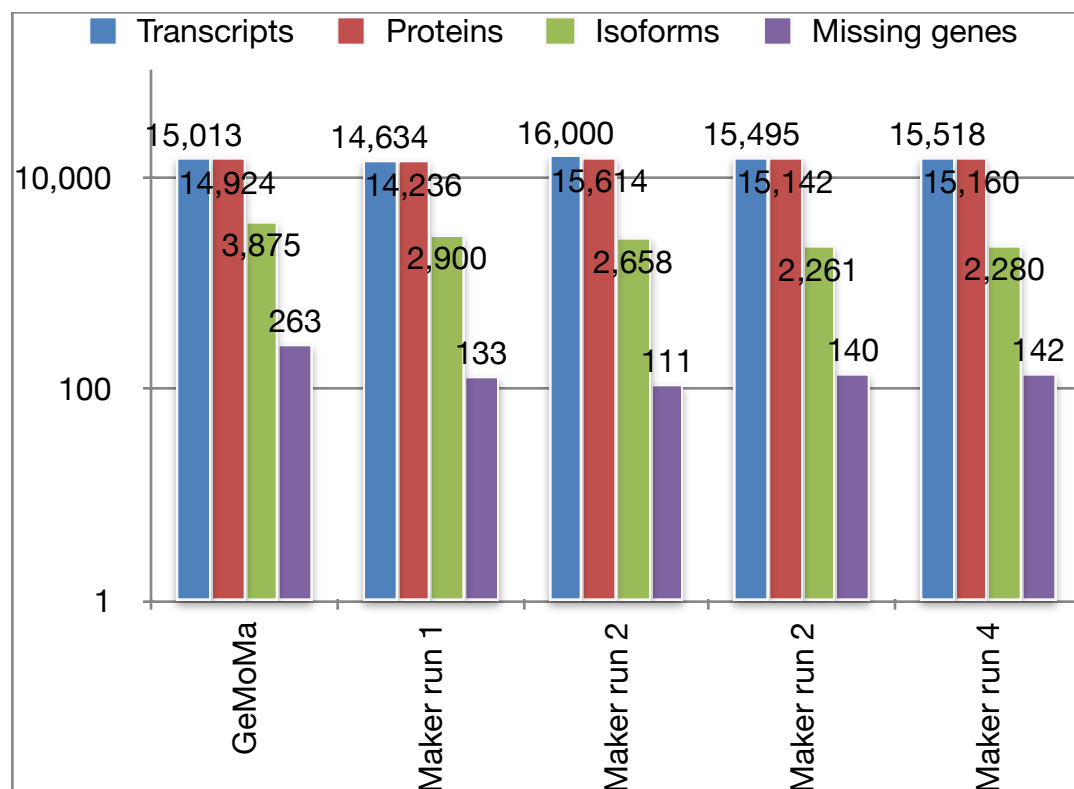

Supplementary Figure 1. Number of predictions and assessment of completeness through the annotation procedure. This analysis is based on unique/non-redundant sets of transcripts and proteins coming out of the annotation steps.

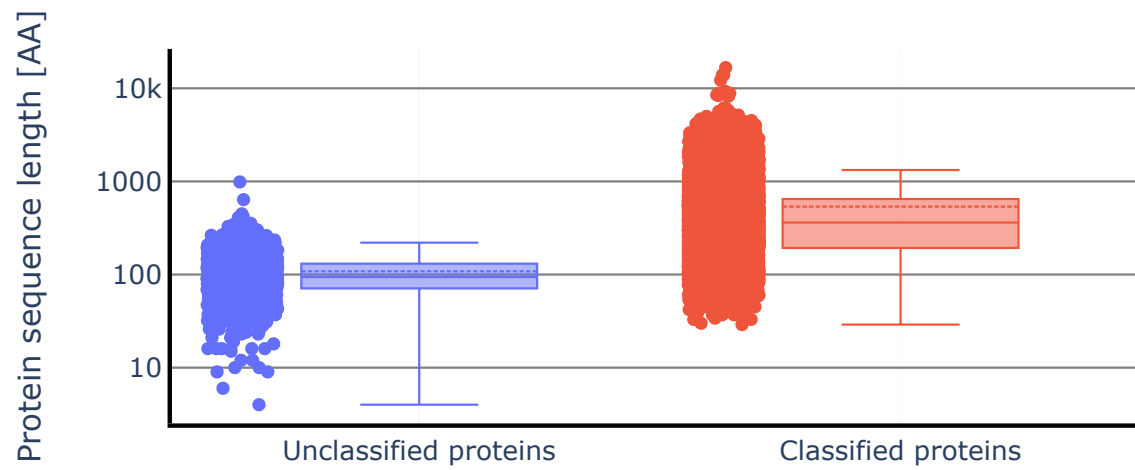

Supplementary Figure 2. Sequence length distribution of functionally classified and unclassified proteins. Please notice that the y axis is log scaled. The dotted line represents the mean and the solid line the median.

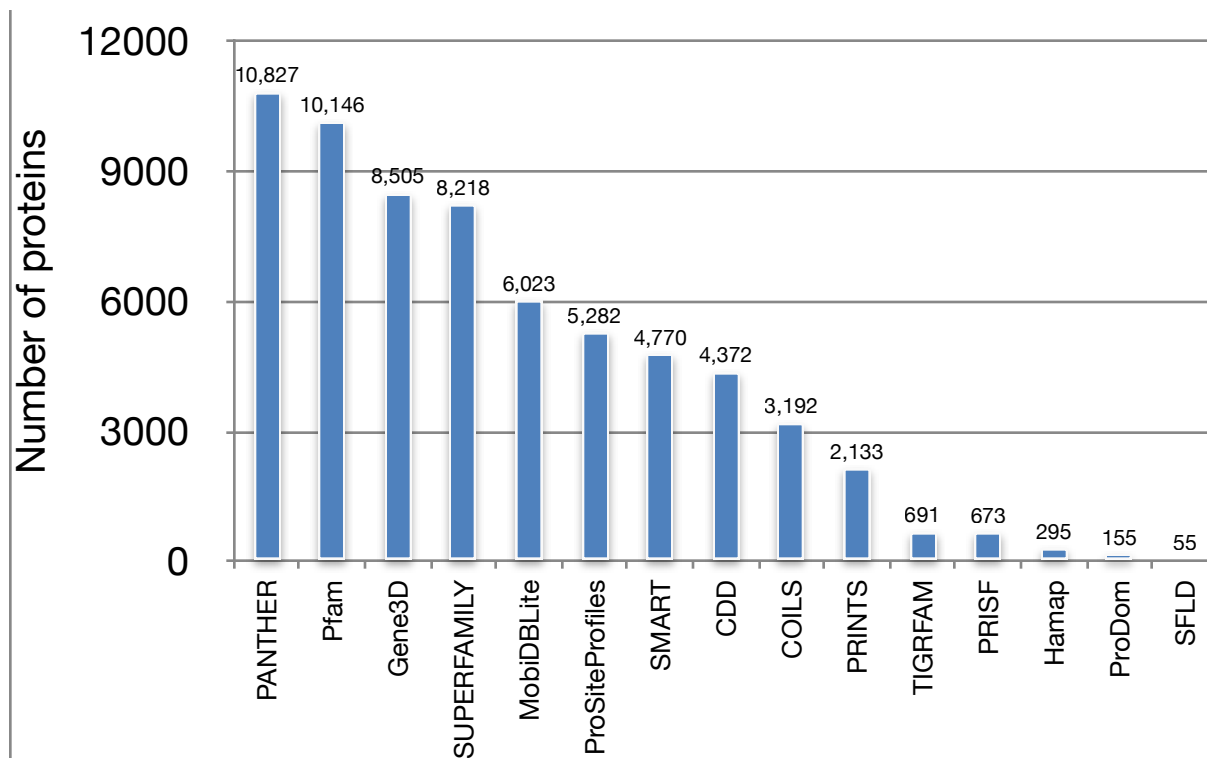

Supplementary Figure 3. Interproscan prediction distribution of classified proteins.



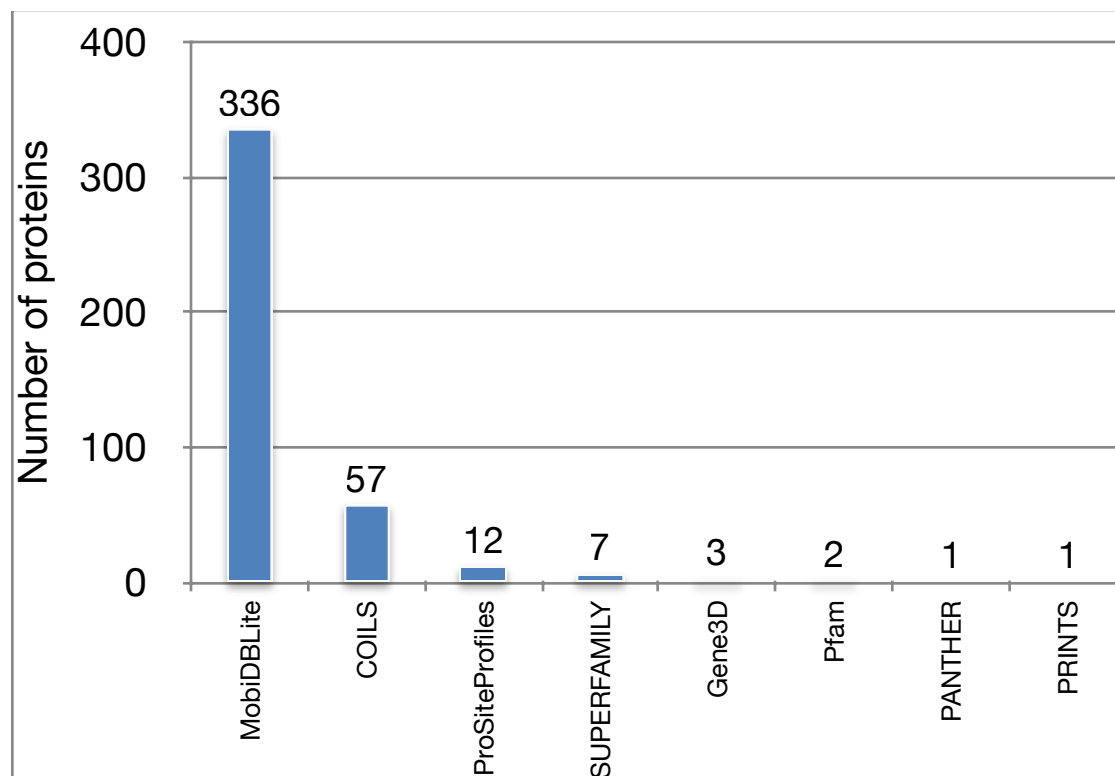

Supplementary Figure 4: Interproscan prediction distribution of non-classified proteins.

Supplementary Table 1. RefSeq accession numbers of assemblies and annotations from relative insects used for the gene annotation.

| Species              | RefSeq Accession | Assembly Name | Date of Access |
|----------------------|------------------|---------------|----------------|
| <i>P. barbatus</i>   | GCF_000187915.1  | Pbar_UMD_V03  | May 2018       |
| <i>S. invicta</i>    | GCF_000188075.1  | Si_gnH        | May 2018       |
| <i>C. floridanus</i> | GCF_003227725.1  | Cflo_v7.5     | July 2018      |
| <i>A. mellifera</i>  | GCF_000002195.4  | Amel_4.5      | May 2018       |

Supplementary Table 2. Improving of the *P. californicus* assembly by polishing procedure.

|                        | Assembly size (bp) | Number of Ns per 1 kb |
|------------------------|--------------------|-----------------------|
| Draft assembly         | 240,287,203        | 13.00                 |
| 1st round of polishing | 240,787,628        | 11.91                 |
| 2nd round of polishing | 241,014,132        | 11.64                 |
| 3rd round of polishing | 241,081,918        | 11.53                 |

Supplementary Table 3. Number of OR gene models in the annotation of the *P. barbatus* genome available in NCBI as well as those predicted by the custom pipeline for both the *P. californicus* and *P. barbatus* genomes. Incomplete gene models are either missing N- and/or C-termini or, in case of the original annotation of *P. barbatus*, could not be identified as OR genes, but contain an OR domain. Homology based predictions do not contain an OR domain at all.

| Species assembly                       | All OR gene models | Perfect OR gene models | Incomplete OR gene models | Homology based OR gene models |
|----------------------------------------|--------------------|------------------------|---------------------------|-------------------------------|
| <i>P. barbatus</i> (manual annotation) | 274                | 109                    | 165                       | 0                             |
| <i>P. californicus</i>                 | 417                | 303                    | 67                        | 47                            |
| <i>P. barbatus</i>                     | 454                | 342                    | 43                        | 69                            |

Supplementary Table 4. Number of complete, incomplete, and homology based gene models predicted by the custom pipeline for both *P. californicus* and *P. barbatus* in the OR gene families.

| OR gene family | Pcal complete | Pcal incomplete | Pcal domain missing | Pbar complete | Pbar incomplete | Pbar domain missing |
|----------------|---------------|-----------------|---------------------|---------------|-----------------|---------------------|
| 9E             | 118           | 32              | 23                  | 141           | 22              | 37                  |
| A              | 9             | 1               | 3                   | 10            | 1               | 2                   |
| B              | -             | 1               | -                   | 1             | -               | -                   |
| C              | -             | 1               | 1                   | 1             | -               | -                   |
| D              | 3             | -               | -                   | 4             | -               | -                   |
| E              | 24            | 5               | 3                   | 28            | 2               | 6                   |
| F              | 8             | -               | -                   | 8             | -               | -                   |
| G              | 1             | 1               | 6                   | 2             | -               | 9                   |
| H              | 10            | 6               | 3                   | 12            | 1               | 1                   |
| I              | 1             | -               | -                   | 1             | -               | -                   |
| J              | 3             | 1               | -                   | 2             | -               | -                   |
| K              | 2             | -               | -                   | 2             | -               | -                   |
| L              | 42            | 3               | 1                   | 44            | -               | 4                   |
| M              | 4             | -               | -                   | 4             | -               | -                   |
| N              | 4             | -               | -                   | 4             | -               | -                   |
| Orco           | 1             | -               | -                   | 1             | -               | -                   |
| P              | 9             | -               | -                   | 8             | -               | -                   |
| Q              | 1             | -               | -                   | 1             | -               | -                   |
| R              | 1             | 1               | -                   | 1             | -               | 1                   |
| S              | 1             | -               | -                   | 1             | -               | -                   |
| T              | 1             | 3               | -                   | 6             | -               | -                   |
| U              | 18            | 7               | 1                   | 19            | 13              | 3                   |
| V              | 40            | 5               | 3                   | 39            | 4               | 4                   |
| W              | 1             | -               | -                   | 1             | -               | -                   |
| X              | -             | -               | 1                   | -             | -               | 1                   |
| XA             | -             | -               | -                   | -             | -               | 1                   |
| Z              | 1             | -               | 2                   | 1             | -               | -                   |
